# Supplementary material
Source: ML conference proceedings conference paper supplement (https://openaccess.thecvf.com/content/WACV2022/html/Jeong_mToFNet_Object_Anti-Spoofing_WACV_2022_paper.html)
Supplement: Supplementary file 4 [file Jeong_mToFNet_Object_Anti-Spoofing_WACV_2022_supplemental.zip]

Real Image

Display Spoof Images

Original

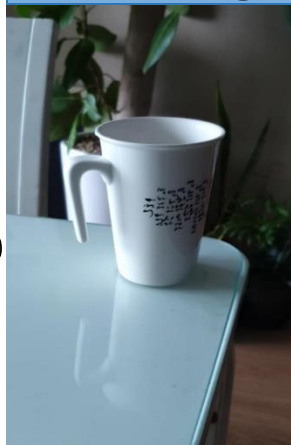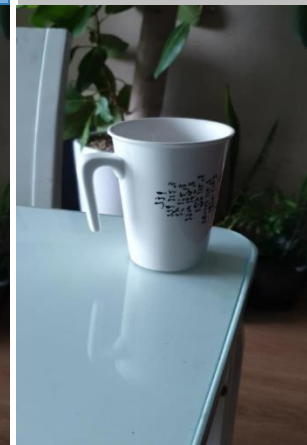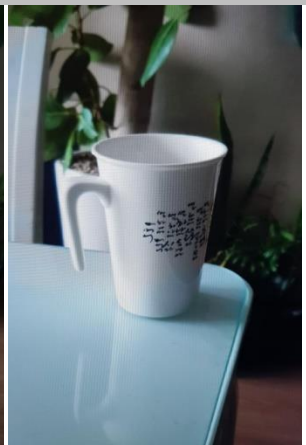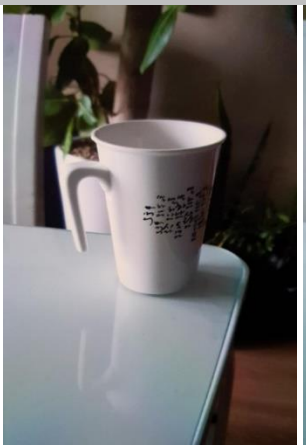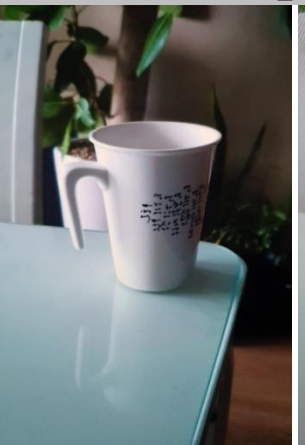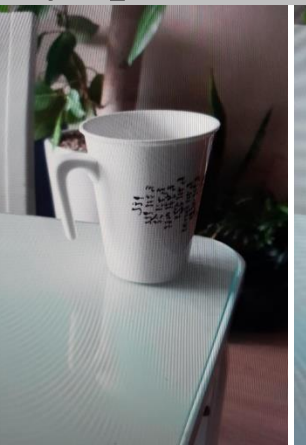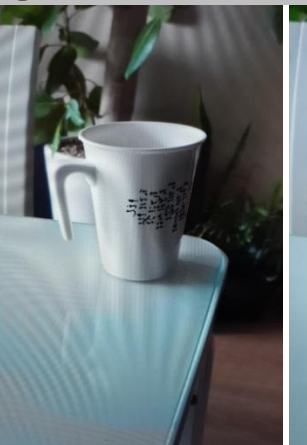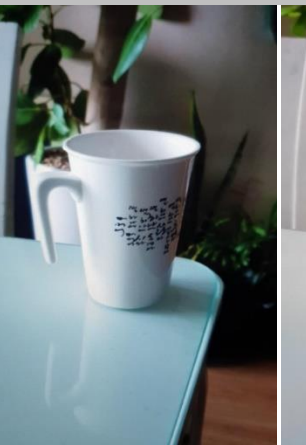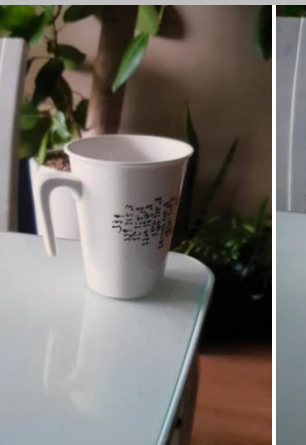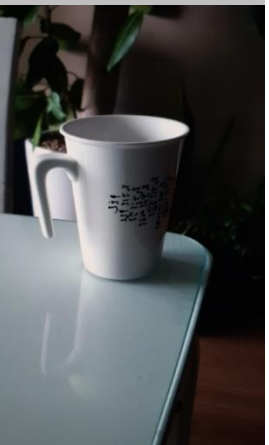

Edged

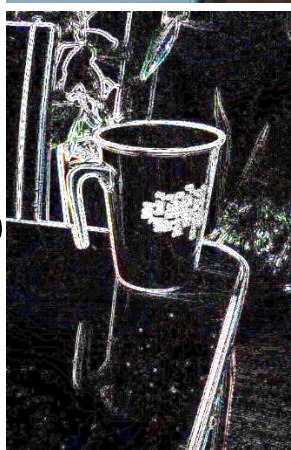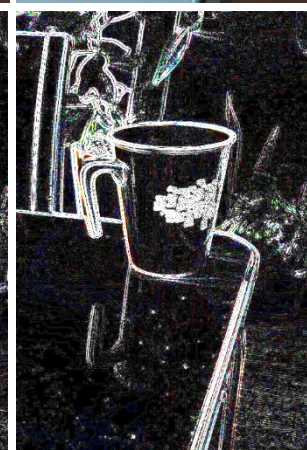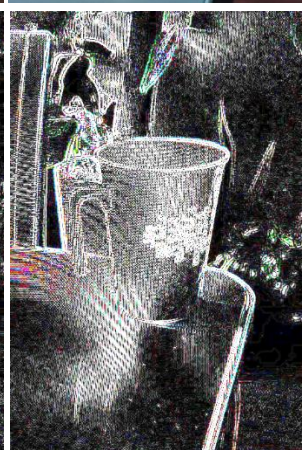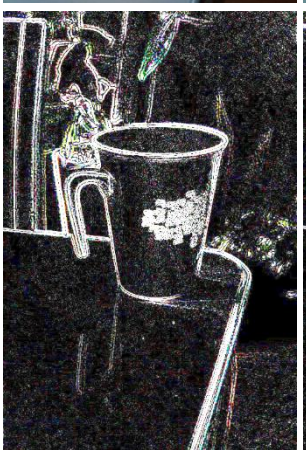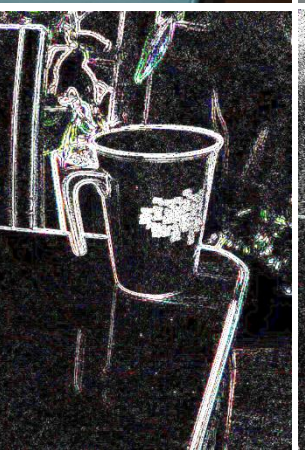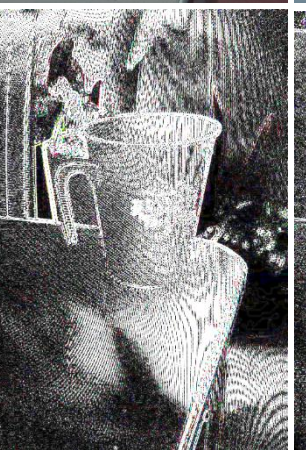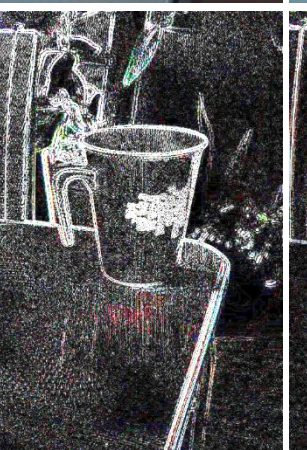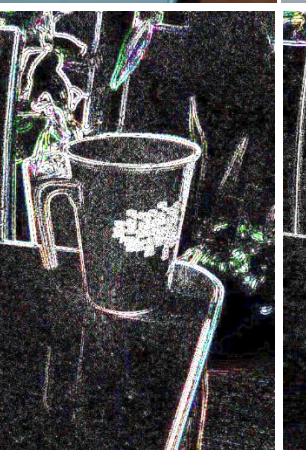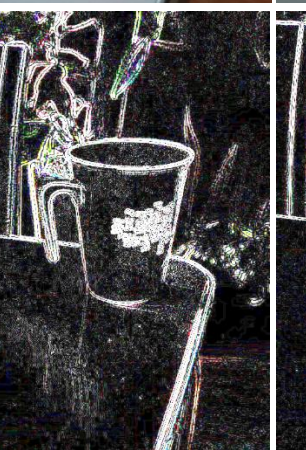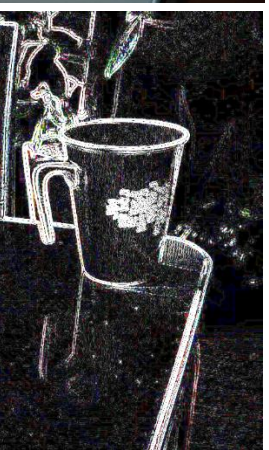

Real

Lenovo  
Legion 5Samsung  
PEN-SSamsung  
Galaxy S20USamsung  
Galaxy Tab SSamsung  
Curved LEDLG  
LCDApple  
iPad 6GenApple  
iPhone11 ProApple  
iMac LCD
