# Supplementary material
Source: ML conference proceedings conference paper supplement (https://openaccess.thecvf.com/content/WACV2022/html/Jeong_mToFNet_Object_Anti-Spoofing_WACV_2022_paper.html)

Power Spectrum

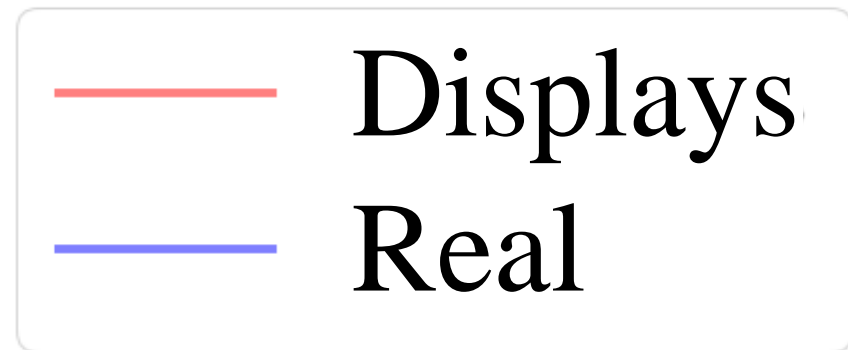

0

50

100

150

200

Spatial Frequency

Supplement: Supplementary file 1 [file Jeong_mToFNet_Object_Anti-Spoofing_WACV_2022_supplemental.zip]

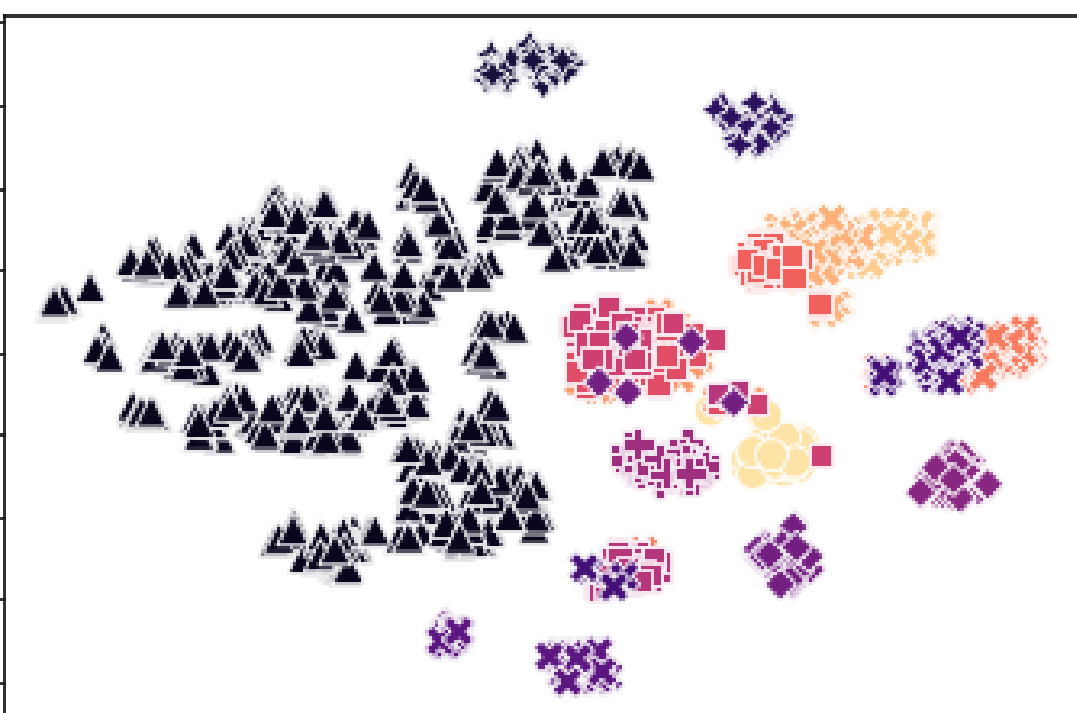

(a) Multi-modal embedding model

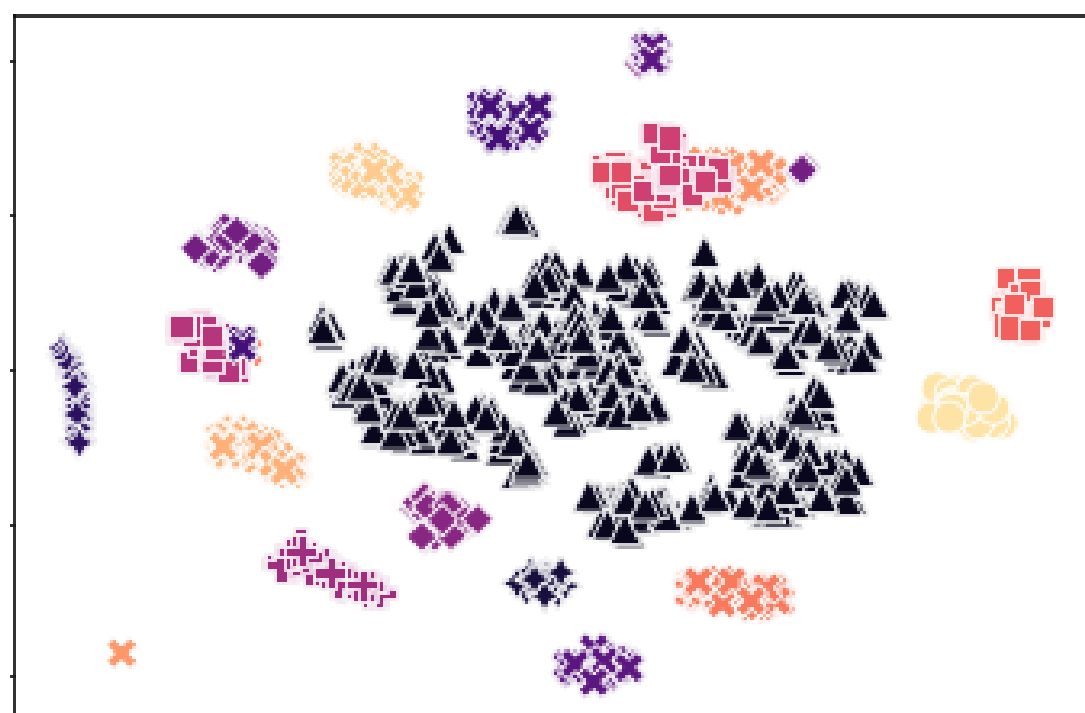

(b) ToF-modal embedding model

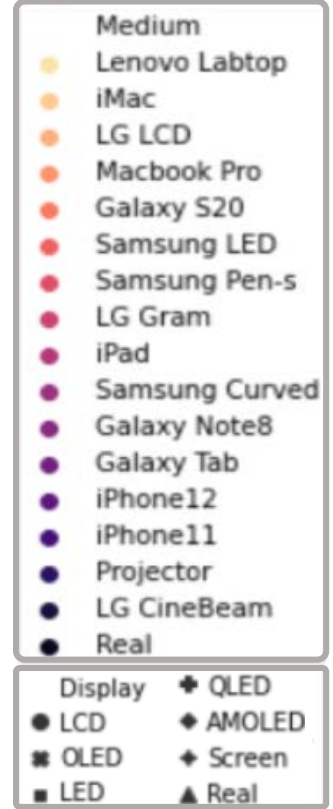

Supplement: Supplementary file 2 [file Jeong_mToFNet_Object_Anti-Spoofing_WACV_2022_supplemental.zip]

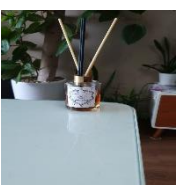 $x_I$ 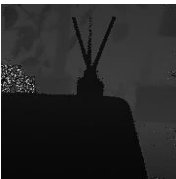 $x_T$ 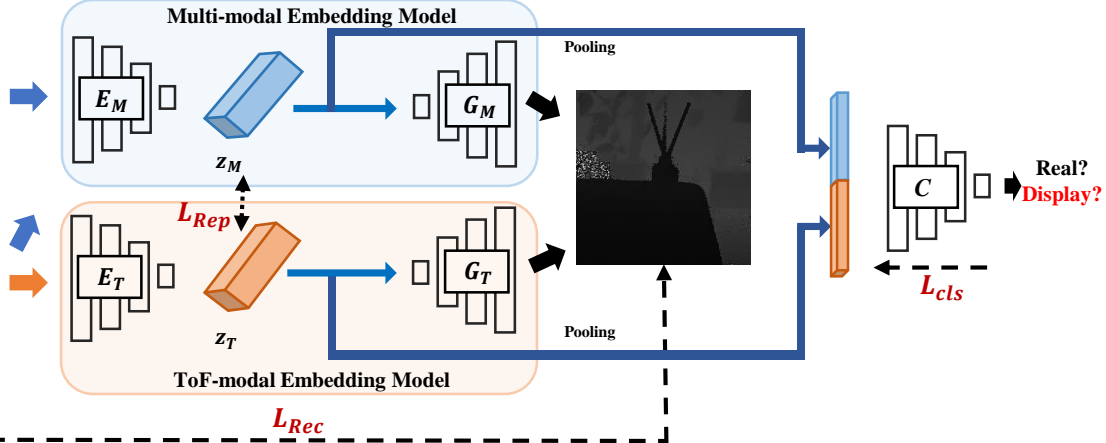

Supplement: Supplementary file 3 [file Jeong_mToFNet_Object_Anti-Spoofing_WACV_2022_supplemental.zip]

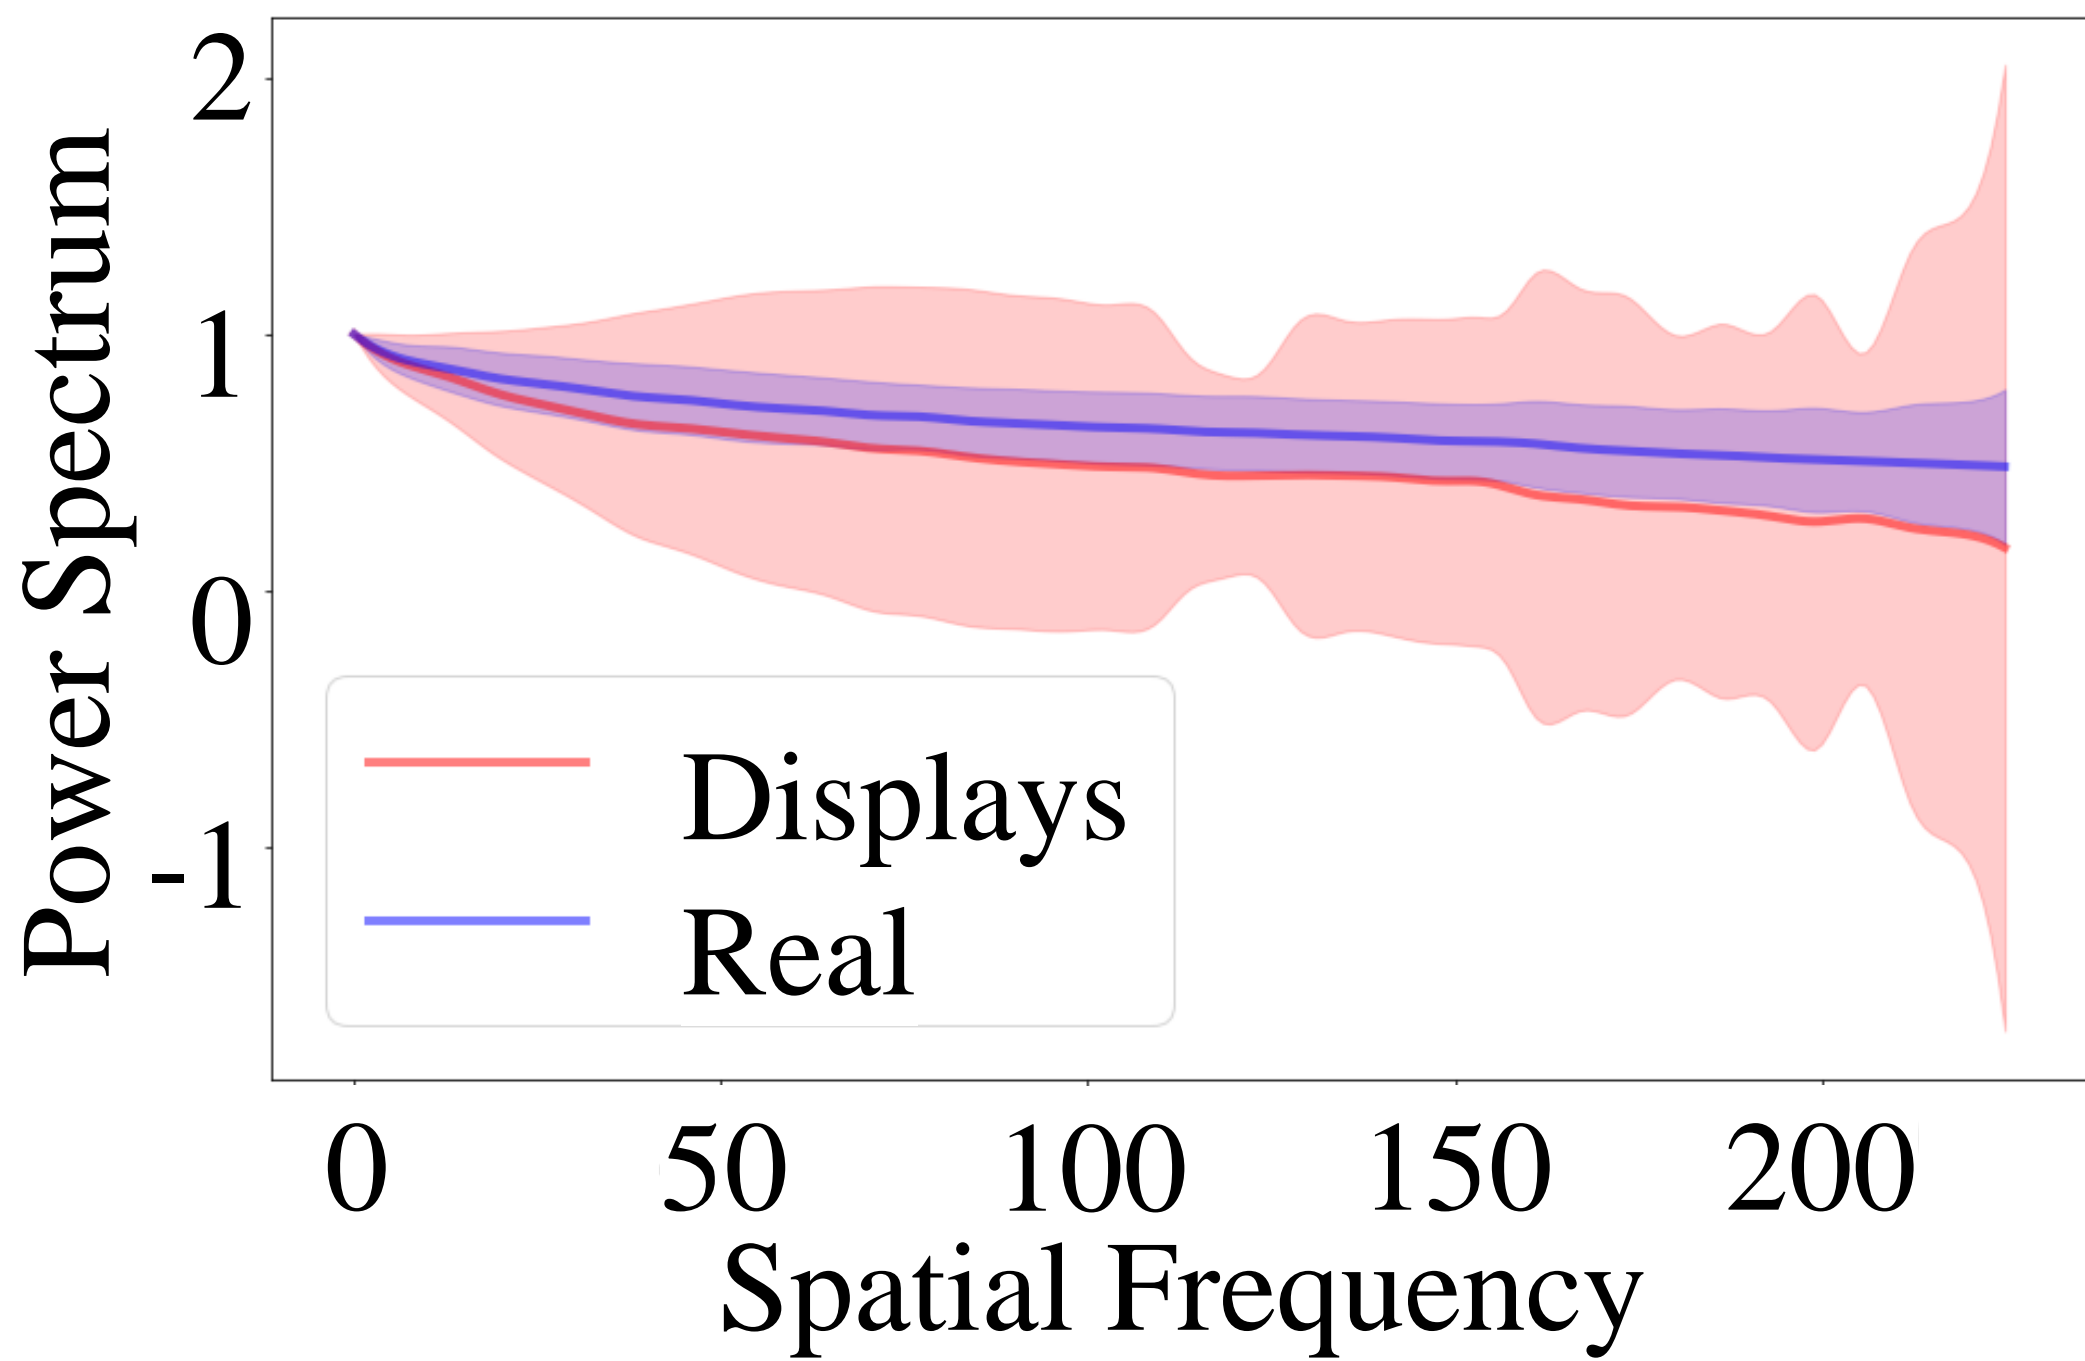

Supplement: Supplementary file 5 [file Jeong_mToFNet_Object_Anti-Spoofing_WACV_2022_supplemental.zip]

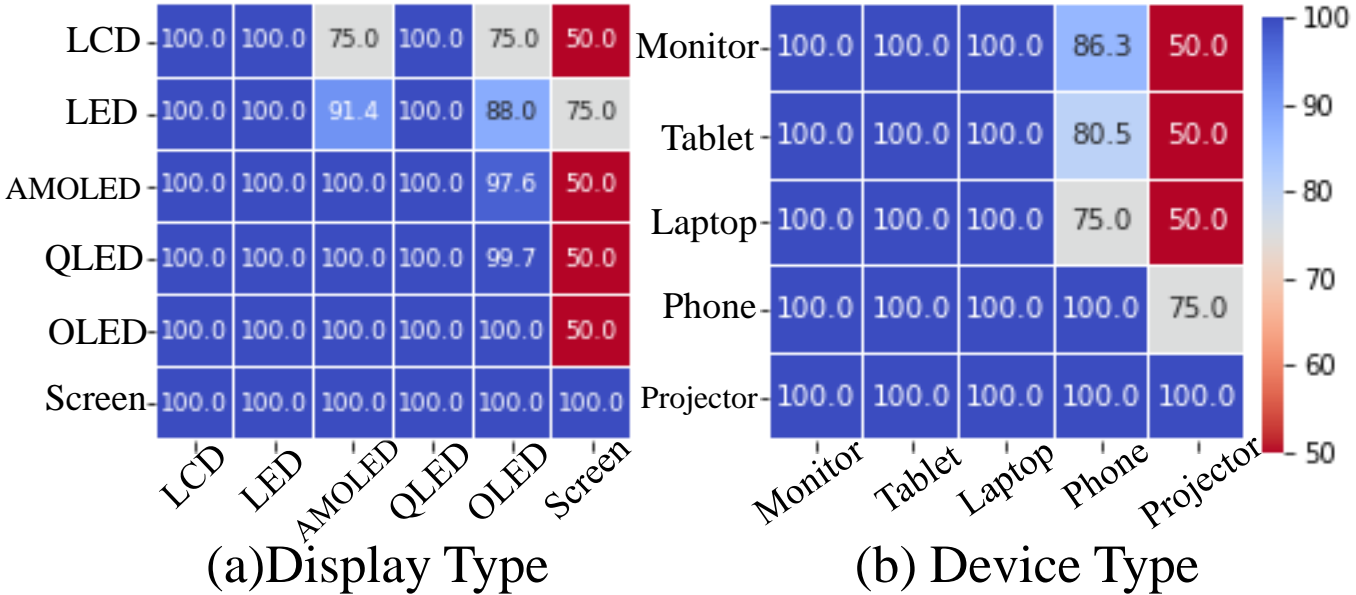

Supplement: Supplementary file 6 [file Jeong_mToFNet_Object_Anti-Spoofing_WACV_2022_supplemental.zip]
